# Supplementary material for: Transition of polyimide/α-Fe2O3 to polyimide/Fe3O4 nanocomposite films by adjusting thermal treatment surroundings of ion-doped substrates
Source: Royal Society of Chemistry journal article supplement (doi:10.1039/c3ra41461b), 2013-01-01
Supplement: c3ra41461b.pdf [file c3ra41461b.pdf]

## Supporting Information

# Transition of Polyimide/ $\alpha$ -Fe<sub>2</sub>O<sub>3</sub> to Polyimide/Fe<sub>3</sub>O<sub>4</sub> Nanocomposite Films by Adjusting Thermal Treatment Surroundings of Ion-exchanged films

*Guanghui Cui, Wei Liu, Liangxu Yuan, Dezhen Wu, Zhanpeng Wu\**

Key Laboratory of Carbon Fiber and Functional Polymers, Ministry of Education,

Beijing University of Chemical Technology, Beijing 100029, China

Email: wuzp@mail.buct.edu.cn

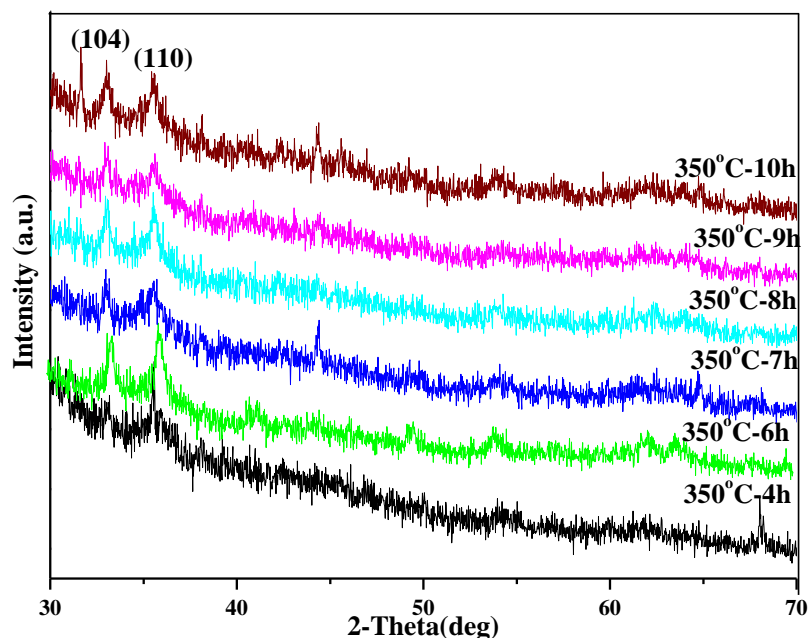

**Figure S1** XRD patterns for the PI/iron oxide composite films obtained in different thermal treatment stages

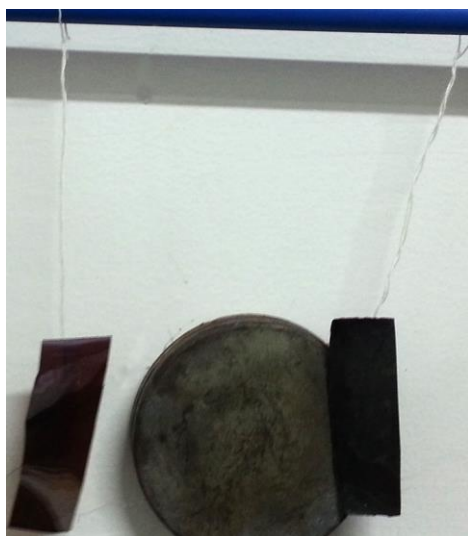

**Figure S2** photograph shows that PI/ $\alpha$ -Fe<sub>2</sub>O<sub>3</sub> (left) can not, but PI/Fe<sub>3</sub>O<sub>4</sub> (right) composite films can be attracted by a permanent magnet. The composite films are hung freely under an iron support with a permanent magnet in the middle.
